# Supplementary material for: Cholinergic Modulation of Disorder-Relevant Neural Circuits in Generalized Anxiety Disorder
Source: PubMed Central journal article supplement (PMC7198974; doi:10.1016/j.biopsych.2019.12.013), 2020-05-15
Supplement: mmc1.pdf [file mmc1.pdf]

## Cholinergic Modulation of Disorder-Relevant Neural Circuits in Generalized Anxiety Disorder

### *Supplemental Information*

**Table S1. Activation elicited by viewing fearful faces in the placebo condition ( $p < .05$  FDR corrected).** There were no clusters that showed significant deactivation in the fearful face condition relative to baseline.

| Region                                                                                        | Brodmann areas | Cluster extent (voxels) | $T$   | $p$    | MNI coordinates |
|-----------------------------------------------------------------------------------------------|----------------|-------------------------|-------|--------|-----------------|
| Cerebellum, lingual gyrus, superior occipital gyrus, middle occipital gyrus, calcarine sulcus | 18, 19         | 7730                    | 10.56 | < .001 | 12, -55, -19    |
| Precentral gyrus                                                                              | 6              | 118                     | 6.63  | < .001 | 45, -7, 53      |
| Inferior frontal gyrus                                                                        | 44             | 166                     | 6.41  | < .001 | 42, 17, 20      |
| Inferior frontal gyrus                                                                        | 44             | 44                      | 6.13  | 0.007  | -33, 14, 23     |
| Middle frontal gyrus                                                                          | 46             | 91                      | 5.87  | < .001 | -27, 41, 26     |
| Superior frontal gyrus                                                                        | 46             | 73                      | 5.8   | 0.001  | 24, 44, 14      |
| Postcentral gyrus, angular gyrus                                                              | 40, 7          | 201                     | 5.61  | < .001 | 27, -37, 44     |
| Supramarginal gyrus                                                                           | 42             | 45                      | 4.89  | 0.007  | 60, -40, 26     |

**Table S2. Comparisons between drug conditions for all emotions.** F-tests represent the overall main effect of drug in an ANOVA, while t-tests represent the comparison between each drug and placebo. Degrees of freedom differ across drug conditions due to differing numbers of excluded subjects based on motion. Positive  $t$  values represent a reduction in activity relative to placebo.

| Emotion | Hemisphere | F-test                          | Lorazepam                                                         | BNC210 low dose                                                   | BNC210 high dose              |
|---------|------------|---------------------------------|-------------------------------------------------------------------|-------------------------------------------------------------------|-------------------------------|
| Fear    | Left       | $F(3, 69) = 1.53$<br>$p = 0.38$ | $t(19) = 1.78$<br>$p = 0.088$                                     | <b><math>t(19) = 2.78</math></b><br><b><math>p = 0.011</math></b> | $t(19) = 0.2$<br>$p = 0.61$   |
|         | Right      | $F(3, 69) = 2.56$<br>$p = 0.12$ | <b><math>t(19) = 2.12</math></b><br><b><math>p = 0.047</math></b> | <b><math>t(19) = 3.07</math></b><br><b><math>p = 0.006</math></b> | $t(19) = 0.07$<br>$p = 0.69$  |
| Happy   | Left       | $F(3, 73) = 0.62$<br>$p = 0.85$ | $t(18) = 1.82$<br>$p = 0.08$                                      | $t(18) = 0.97$<br>$p = 0.31$                                      | $t(18) = 0.97$<br>$p = 0.31$  |
|         | Right      | $F(3, 73) = 0.19$<br>$p = 0.99$ | $t(18) = 0.80$<br>$p = 0.39$                                      | $t(18) = 1.30$<br>$p = 0.20$                                      | $t(18) = 0.46$<br>$p = 0.54$  |
| Sad     | Left       | $F(3, 61) = 2.01$<br>$p = 0.22$ | <b><math>t(15) = 2.74</math></b><br><b><math>p = 0.015</math></b> | $t(15) = 1.03$<br>$p = 0.30$                                      | $t(15) = -0.98$<br>$p = 0.97$ |
|         | Right      | $F(3, 61) = 0.81$<br>$p = 0.74$ | $t(15) = 1.64$<br>$p = 0.12$                                      | $t(15) = 0.58$<br>$p = 0.49$                                      | $t(15) = -0.31$<br>$p = 0.85$ |
